# Supplementary material for: Geographical and Varietal Traceability of Chinese Jujubes Based on Physical and Nutritional Characteristics
Source: MDPI journal article supplement (doi:10.3390/foods10102270), 2021-09-25
Supplement: s1 [file s1]

**Table S1** Reference conditions of sample digester

| Step | Control temperature(℃) | Heating time (min) | incubation time(min) |
|------|------------------------|--------------------|----------------------|
| 1    | 120                    | 5                  | 5                    |
| 2    | 150                    | 5                  | 10                   |
| 3    | 190                    | 5                  | 20                   |

Table S2 Contents of 15 individual amino acids in Chinese jujubes from different categories.

| Category     | aspartate   | threonine   | serine      | glutamate    | proline     | glycine      | alanine     | valine      | isoleucine    | leucine      | tyrosine      | phenylalanine | lysine       | histidine     | arginine      |
|--------------|-------------|-------------|-------------|--------------|-------------|--------------|-------------|-------------|---------------|--------------|---------------|---------------|--------------|---------------|---------------|
|              | (g/100g)    | (g/100g)    | (g/100g)    | (g/100g)     | (g/100g)    | (g/100g)     | (g/100g)    | (g/100g),   | (g/100g)      | (g/100g)     | (g/100g)      | (g/100g)      | (g/100g)     | (g/100g)      | (g/100g)      |
| Henan        | 0.23±0.04c  | 0.030±0.00c | 0.034±0.01b | 0.058±0.00d  | 0.52±0.04c  | 0.028±0.00e  | 0.026±0.01c | 0.030±0.00c | 0.026±0.005bc | 0.048±0.005c | 0.028±0.005b  | 0.042±0.005d  | 0.040±0.000c | 0.010±0.000c  | 0.020±0.000d  |
| Huizao       |             |             |             |              |             |              |             |             |               |              |               |               |              |               |               |
| Hebei        | 0.24±0.04c  | 0.030±0.00c | 0.030±0.00b | 0.060±0.01d  | 0.40±0.04de | 0.030±0.00de | 0.030±0.00c | 0.030±0.00c | 0.020±0.000d  | 0.040±0.000d | 0.020±0.000c  | 0.038±0.005d  | 0.038±0.004c | 0.012±0.004c  | 0.020±0.000d  |
| Jinsixiaozao |             |             |             |              |             |              |             |             |               |              |               |               |              |               |               |
| Shanxi       | 0.27±0.01bc | 0.030±0.00c | 0.036±0.01b | 0.062±0.00d  | 0.33±0.03e  | 0.030±0.00de | 0.036±0.01b | 0.040±0.00b | 0.022±0.004cd | 0.048±0.005c | 0.034±0.009ab | 0.048±0.005c  | 0.042±0.004c | 0.018±0.004b  | 0.040±0.007b  |
| Hupingzao    |             |             |             |              |             |              |             |             |               |              |               |               |              |               |               |
| Shaanxi      | 0.25±0.14c  | 0.030±0.00c | 0.038±0.01b | 0.065±0.01cd | 0.56±0.05c  | 0.035±0.01cd | 0.040±0.00b | 0.040±0.00b | 0.030±0.000b  | 0.053±0.005c | 0.040±0.000a  | 0.050±0.000bc | 0.048±0.005b | 0.020±0.000ab | 0.025±0.006d  |
| Xiangzao     |             |             |             |              |             |              |             |             |               |              |               |               |              |               |               |
| Shaanxi      | 0.23±0.02c  | 0.034±0.01c | 0.034±0.01b | 0.074±0.01c  | 0.43±0.02d  | 0.038±0.00c  | 0.038±0.00b | 0.040±0.00b | 0.030±0.000b  | 0.060±0.000b | 0.040±0.000a  | 0.050±0.000bc | 0.050±0.000b | 0.020±0.000ab | 0.054±0.005a  |
| Tanzao       |             |             |             |              |             |              |             |             |               |              |               |               |              |               |               |
| Xinjiang     | 0.44±0.03a  | 0.053±0.01a | 0.053±0.01a | 0.087±0.01b  | 0.71±0.08b  | 0.050±0.00a  | 0.048±0.00a | 0.055±0.01a | 0.037±0.005a  | 0.070±0.000a | 0.035±0.005a  | 0.057±0.005a  | 0.058±0.004a | 0.025±0.005a  | 0.035±0.005bc |
| Junzao       |             |             |             |              |             |              |             |             |               |              |               |               |              |               |               |
| Region       | 0.33±0.07b  | 0.047±0.01b | 0.050±0.01a | 0.098±0.01a  | 0.85±0.12a  | 0.045±0.01b  | 0.047±0.01a | 0.053±0.01a | 0.037±0.005a  | 0.068±0.008a | 0.038±0.004a  | 0.055±0.005ab | 0.050±0.006b | 0.023±0.005ab | 0.032±0.004c  |

**Table S3** Characteristics of 31 quality indicators of Chinese jujubes.

| Quality parameter          | Mean    | Range           | Standard deviation | CV (%) <sup>a</sup> |
|----------------------------|---------|-----------------|--------------------|---------------------|
| soluble sugar (%)          | 28.13   | 18.10-40.40     | 7.92               | 28.16               |
| ascorbic acid (mg/100g)    | 171.22  | 19.00-357.00    | 113.61             | 66.35               |
| fresh mass(g)              | 13.68   | 5.49-31.25      | 6.89               | 50.37               |
| shape ratio                | 1.37    | 0.73-1.75       | 0.17               | 12.69               |
| edible rate(%)             | 94.02   | 91.71-96.41     | 1.27               | 1.35                |
| moisture content(%)        | 57.41   | 31.70-71.50     | 12.97              | 22.59               |
| Na(mg/kg)                  | 100.53  | 2.90-519.70     | 135.65             | 134.93              |
| Mg(mg/kg)                  | 244.56  | 133.00-536.00   | 93.27              | 38.14               |
| K(mg/kg)                   | 4225.50 | 1918.00-9275.00 | 1954.22            | 46.25               |
| Mn(mg/kg)                  | 2.23    | 1.20-3.40       | 0.50               | 22.22               |
| Fe(mg/kg)                  | 7.64    | 2.80-21.00      | 4.80               | 62.86               |
| Cu(mg/kg)                  | 1.27    | 0.57-2.30       | 0.39               | 30.96               |
| Zn(mg/kg)                  | 2.94    | 1.60-4.20       | 0.71               | 23.98               |
| dietary fiber(%)           | 6.08    | 4.51-6.88       | 0.69               | 11.39               |
| cAMP (mg/kg)               | 87.87   | 22.66-246.43    | 63.15              | 71.86               |
| aspartate(g/100g)          | 0.29    | 0.030-0.49      | 0.095              | 32.61               |
| threonine (g/100g)         | 0.037   | 0.030-0.060     | 0.010              | 26.96               |
| serine (g/100g)            | 0.040   | 0.030-0.060     | 0.010              | 26.05               |
| glutamate(g/100g)          | 0.073   | 0.050-0.11      | 0.017              | 22.59               |
| proline (g/100g)           | 0.56    | 0.29-0.97       | 0.19               | 34.03               |
| glycine (g/100g)           | 0.037   | 0.020-0.050     | 0.0088             | 23.71               |
| alanine (g/100g)           | 0.038   | 0.020-0.050     | 0.0088             | 22.92               |
| valine (g/100g)            | 0.042   | 0.030-0.060     | 0.010              | 24.75               |
| isoleucine(g/100g)         | 0.029   | 0.020-0.040     | 0.0073             | 25.07               |
| leucine(g/100g)            | 0.056   | 0.040-0.080     | 0.012              | 20.55               |
| tyrosine(g/100g)           | 0.034   | 0.020-0.040     | 0.0080             | 23.75               |
| phenylalanine(g/100g)      | 0.049   | 0.030-0.060     | 0.0075             | 15.28               |
| lysine(g/100g)             | 0.047   | 0.030-0.060     | 0.0079             | 16.76               |
| histidine(g/100g)          | 0.019   | 0.010-0.030     | 0.0064             | 34.35               |
| arginine(g/100g)           | 0.033   | 0.020-0.060     | 0.012              | 37.05               |
| total amino acid (mg/100g) | 1.38    | 0.97-2.07       | 0.34               | 24.74               |

<sup>b</sup> "CV" represents "coefficient of variation"

**Table S4** The scores and ranking of Chinese jujubes of different categories.

| categories          | PC score |       |       |       |       | Synthesis<br>score | Ranking |
|---------------------|----------|-------|-------|-------|-------|--------------------|---------|
|                     | PC1      | PC 2  | PC 3  | PC 4  | PC 5  |                    |         |
| Henan Huizao1       | -3.43    | -1.78 | -1.10 | -1.01 | 0.95  | -2.64              | 28      |
| Henan Huizao2       | -4.83    | -2.87 | -1.72 | -0.08 | 0.91  | -3.72              | 36      |
| Henan Huizao3       | -3.64    | -1.92 | -1.16 | -0.97 | 1.21  | -2.79              | 29      |
| Henan Huizao4       | -4.44    | -1.68 | -1.25 | -1.17 | 0.97  | -3.32              | 32      |
| Henan Huizao5       | -3.02    | -0.79 | -1.54 | -2.35 | 1.23  | -2.34              | 27      |
| Hebei Jinsixiaozao1 | -4.99    | -1.90 | -1.01 | 0.80  | -1.46 | -3.68              | 35      |
| Hebei Jinsixiaozao2 | -4.65    | -0.50 | -1.10 | -0.10 | -0.98 | -3.30              | 31      |
| Hebei Jinsixiaozao3 | -4.95    | -1.92 | -0.39 | 0.59  | -0.17 | -3.56              | 34      |
| Hebei Jinsixiaozao4 | -3.97    | -1.47 | -0.31 | 1.21  | -0.75 | -2.83              | 30      |
| Hebei Jinsixiaozao5 | -4.67    | -1.95 | -0.45 | 1.27  | -0.58 | -3.36              | 33      |
| Shanxi Hupingzao1   | -2.17    | 1.06  | -0.48 | 2.89  | 0.12  | -1.14              | 23      |
| Shanxi Hupingzao2   | -2.12    | 2.14  | 0.52  | 0.97  | -0.63 | -1.03              | 22      |
| Shanxi Hupingzao3   | -2.83    | 2.05  | 0.76  | 1.37  | -0.70 | -1.48              | 25      |
| Shanxi Hupingzao4   | -2.98    | 1.88  | -0.58 | -0.29 | -1.20 | -1.85              | 26      |
| Shanxi Hupingzao5   | -1.81    | 2.07  | 0.56  | -0.03 | -0.38 | -0.89              | 21      |
| Shaanxi Xiangzao1   | -1.81    | 1.32  | 0.57  | -2.19 | -1.25 | -1.17              | 24      |
| Shaanxi Xiangzao2   | -1.47    | 1.19  | 1.47  | -2.42 | -0.38 | -0.86              | 20      |
| Shaanxi Xiangzao3   | -1.07    | 1.17  | 0.89  | -1.59 | -0.28 | -0.59              | 17      |
| Shaanxi Xiangzao4   | -1.30    | 2.21  | 0.51  | -2.04 | -0.49 | -0.67              | 18      |
| Shaanxi Tanzao1     | -1.00    | 1.04  | 2.13  | 1.27  | 1.92  | -0.17              | 14      |
| Shaanxi Tanzao2     | -1.15    | 0.39  | 2.42  | 2.12  | 2.03  | -0.27              | 15      |
| Shaanxi Tanzao3     | -0.81    | 0.83  | 1.44  | 1.08  | 2.16  | -0.13              | 13      |
| Shaanxi Tanzao4     | -1.18    | 2.06  | 1.08  | 1.00  | 1.27  | -0.28              | 16      |
| Shaanxi Tanzao5     | -1.78    | 2.61  | 2.76  | -1.05 | -0.35 | -0.67              | 19      |
| Xinjiang Junzao1    | 5.53     | 1.28  | -1.90 | -0.54 | 0.87  | 3.70               | 7       |
| Xinjiang Junzao2    | 5.01     | 1.57  | -1.74 | -1.23 | 0.95  | 3.37               | 10      |
| Xinjiang Junzao3    | 7.14     | 0.58  | -2.18 | 0.27  | 1.23  | 4.72               | 1       |
| Xinjiang Junzao4    | 6.25     | 2.22  | -1.77 | -0.45 | -0.02 | 4.29               | 2       |
| Xinjiang Junzao5    | 5.16     | 1.60  | -2.17 | 1.16  | -0.42 | 3.53               | 9       |
| Xinjiang Junzao6    | 5.33     | 2.03  | -2.33 | 1.79  | -1.22 | 3.69               | 8       |
| Xinjiang Huizao7    | 7.01     | -4.43 | 0.74  | 1.08  | 0.05  | 4.18               | 4       |
| Xinjiang Huizao1    | 6.93     | -2.70 | 1.02  | -0.87 | 0.49  | 4.28               | 3       |
| Xinjiang Huizao2    | 2.83     | -1.27 | 0.82  | 0.33  | -1.91 | 1.71               | 11      |
| Xinjiang Huizao3    | 2.63     | -1.52 | 0.63  | 0.59  | -2.52 | 1.51               | 12      |
| Xinjiang Huizao4    | 6.00     | -2.08 | 2.66  | -0.53 | -0.24 | 3.88               | 6       |
| Xinjiang Huizao5    | 6.24     | -2.53 | 2.20  | -0.90 | -0.40 | 3.90               | 5       |

— Henan Huizao     — Hebei Jinsixiaozao     — Shanxi Hupingzao     — Shaanxi Xiangzao  
— Shaanxi Tanzao     — Xinjiang Junzao     — Xinjiang Huizao

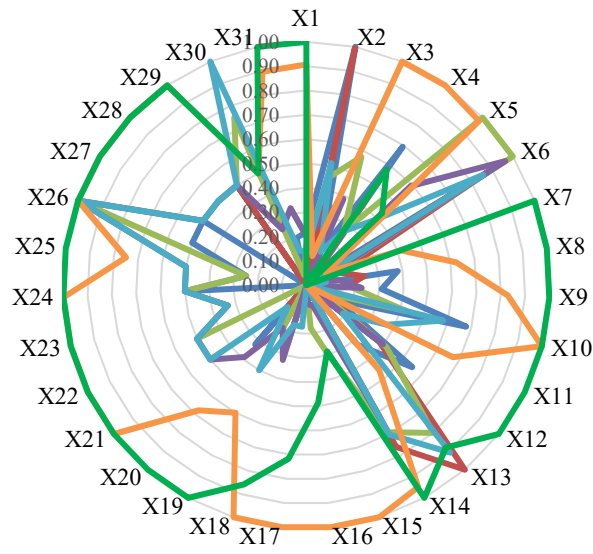

**Figure S1.** Correlations among 31 quality indicators of Chinese jujubes.

X1-X31: soluble sugar (%), ascorbic acid (mg/100g), fresh mass(g), shape ratio, edible rate (%), moisture content (%), Na (mg/kg), Mg (mg/kg), K (mg/kg), Mn (mg/kg), Fe (mg/kg), Cu(mg/kg), Zn(mg/kg), dietary fiber(%), cAMP (mg/kg), aspartate(g/100g), threonine (g/100g), serine (g/100g), glutamate (g/100g), proline (g/100g), glycine (g/100g), alanine (g/100g), valine (g/100g), isoleucine (g/100g), leucine (g/100g), tyrosine (g/100g), phenylalanine (g/100g), lysine (g/100g), histidine (g/100g), arginine (g/100g), total amino acid (mg/100g)
